# Supplementary material for: Variant Allele of ALDH2, rs671, Associates with Attenuated Post-Vaccination Response in Anti-SARS-CoV-2 Spike Protein IgG: A Prospective Study in the Japanese General Population
Source: MDPI journal article supplement (doi:10.3390/vaccines10071035), 2022-06-28
Supplement: s1 [file s1]

## Supplementary Information

Table S1. Estimated correlation coefficients for fixed effects on log-transformed anti-S1 IgM, BAU/mL.

| Fixed effects                             | AIC = 1341.1<br>503 observations<br>88 subjects |                 |
|-------------------------------------------|-------------------------------------------------|-----------------|
|                                           | $\beta$                                         | <i>p</i> -value |
| BNT162b2 (reference)                      | (reference)                                     |                 |
| mRNA-1273                                 | 0.057                                           | 0.7132          |
| Week 0 (reference)                        | (reference)                                     |                 |
| Week 1                                    | 0.718                                           | 0.0015          |
| Week 2                                    | 3.263                                           | <.0001          |
| Week 3                                    | 3.509                                           | <.0001          |
| Week 4                                    | 4.436                                           | <.0001          |
| Week 5                                    | 4.237                                           | <.0001          |
| Week 6                                    | 3.909                                           | <.0001          |
| Week 7                                    | 3.878                                           | <.0001          |
| Week 8                                    | 3.670                                           | <.0001          |
| Week 11                                   | 2.819                                           | <.0001          |
| Week 15                                   | 2.027                                           | <.0001          |
| Week 16                                   | 1.985                                           | <.0001          |
| Age (per year old)                        | -0.011                                          | 0.0201          |
| Female sex                                | -0.281                                          | 0.0525          |
| Body height (per cm)                      | -0.020                                          | 0.0137          |
| Smoking status                            | 0.202                                           | 0.2574          |
| Ethanol intake (per category)             | -0.034                                          | 0.6635          |
| Exercise habit (per category)             | -0.053                                          | 0.1866          |
| Perceived stress (per category)           | 0.009                                           | 0.782           |
| Steroid use                               | -0.766                                          | 0.0126          |
| Allergic disease                          | 0.030                                           | 0.7448          |
| Dyslipidemia                              | -1.511                                          | <.0001          |
| <i>ALDH2</i> (per variant allele)         | -0.006                                          | 0.9275          |
| $\beta$ , Partial correlation coefficient |                                                 |                 |

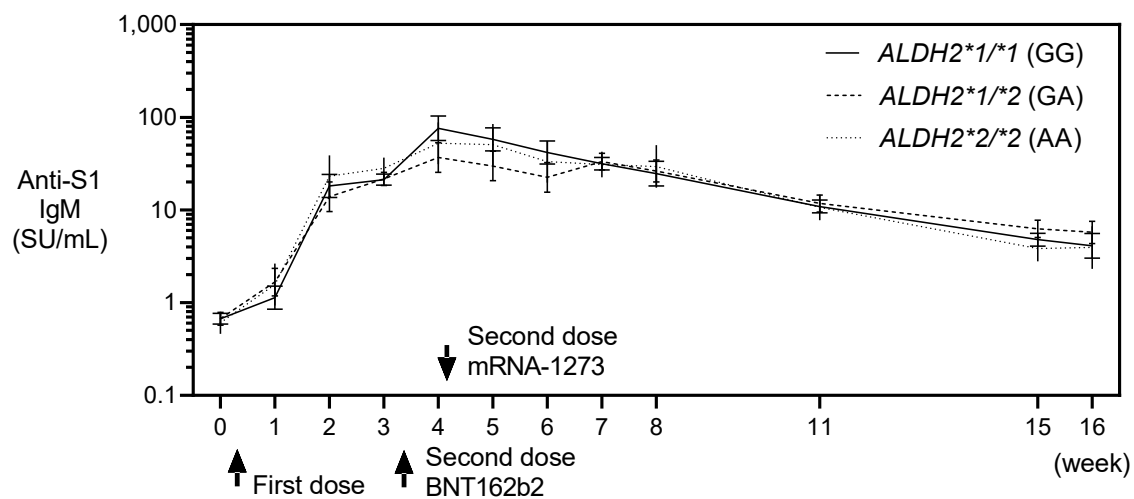

Figure S1. Estimated anti-S1 IgM antibody levels by *ALDH2* rs671 genotype.

Least-squares geometric means and standard errors were computed as shown in Figure 1.
